# Supplementary material for: A Dissipative Particle Dynamics Study of Flow Behaviors in Ultra High Molecular Weight Polyethylene/Polyamide 6 Blends Based on Souza-Martins Method
Source: MDPI journal article supplement (doi:10.3390/polym11081275), 2019-07-31
Supplement: s1 [file s1]

# A dissipative particle dynamics study of flow behaviors in ultra high molecular weight polyethylene/polyamide 6 blends based on Souza-Martins method

Junxia Wang<sup>a</sup>, Changlin Cao<sup>a</sup>, Xiaochuan Chen<sup>a</sup>, Shijie Ren<sup>b</sup>, Dingshan Yu<sup>a\*</sup>

*a* Key Laboratory for Polymeric Composite and Functional Materials of Ministry of Education and Key Laboratory of High Performance Polymer-based Composites of Guangdong Province, School of Chemistry, Sun Yat-Sen University, Guangzhou 510275, China;

*b* State Key Laboratory of Polymer Materials Engineering, Sichuan University, Chengdu 610065, China

\* Corresponding Author E-mail: [yudings@mail.sysu.edu.cn](mailto:yudings@mail.sysu.edu.cn) (D.S. Yu)

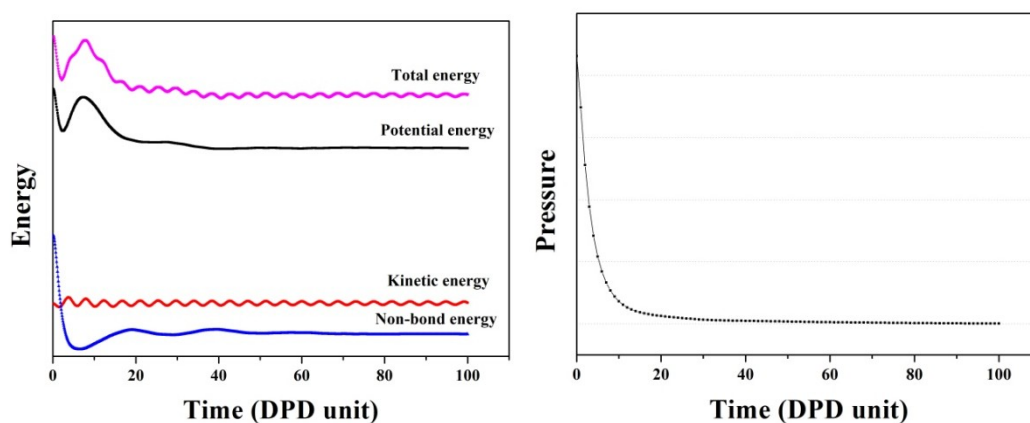

**Figure S1** The energy and pressure that reaches steady state as equilibrated
